# Supplementary material for: Endoglin is a conserved regulator of vasculogenesis in zebrafish – implications for hereditary haemorrhagic telangiectasia
Source: Oxford University Press journal article supplement (doi:10.1042/bsr20182320), 2019-05-01

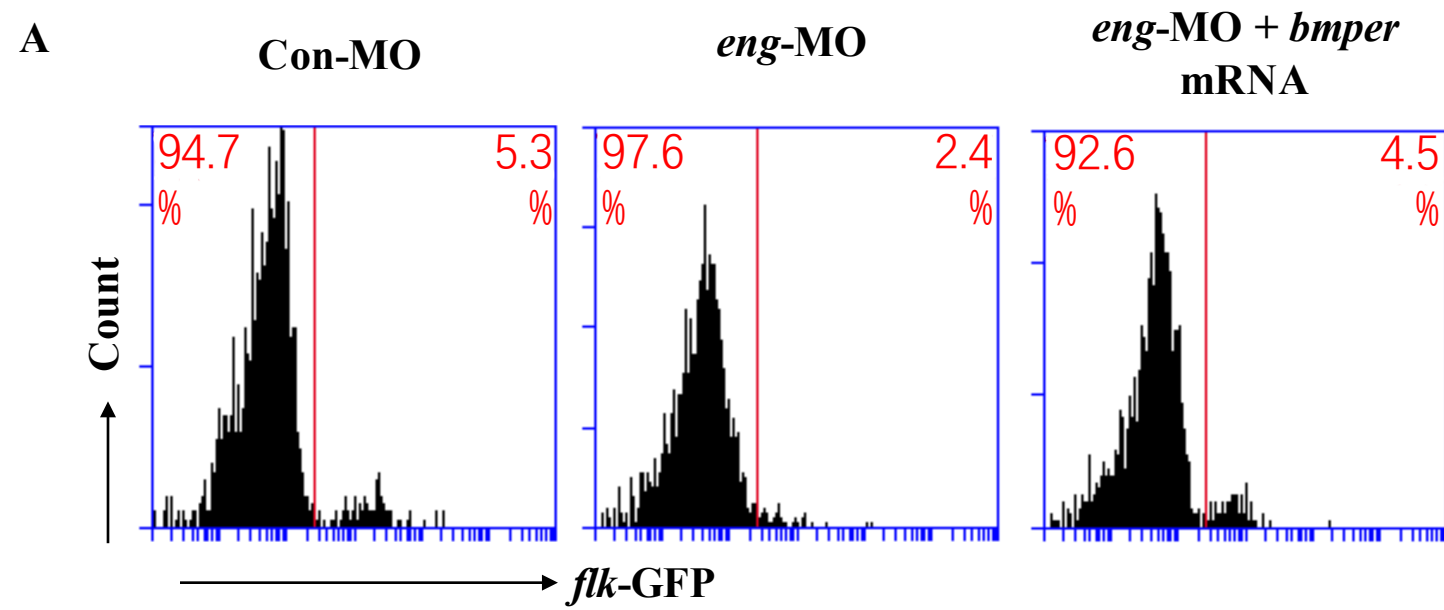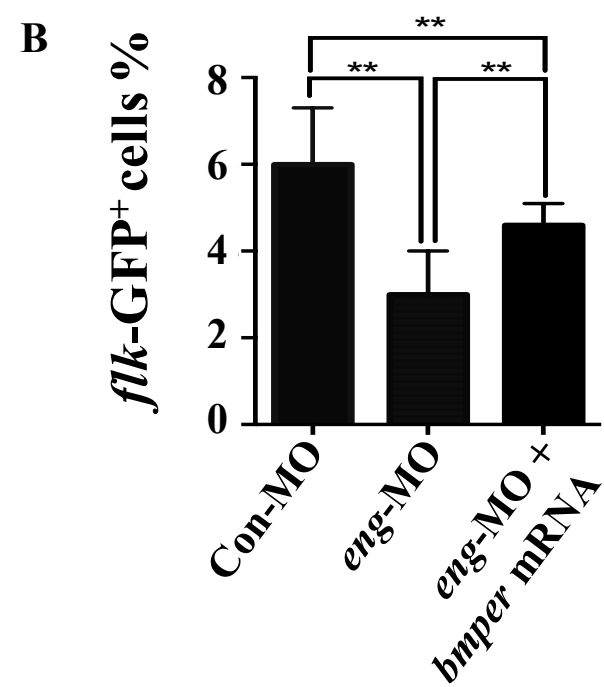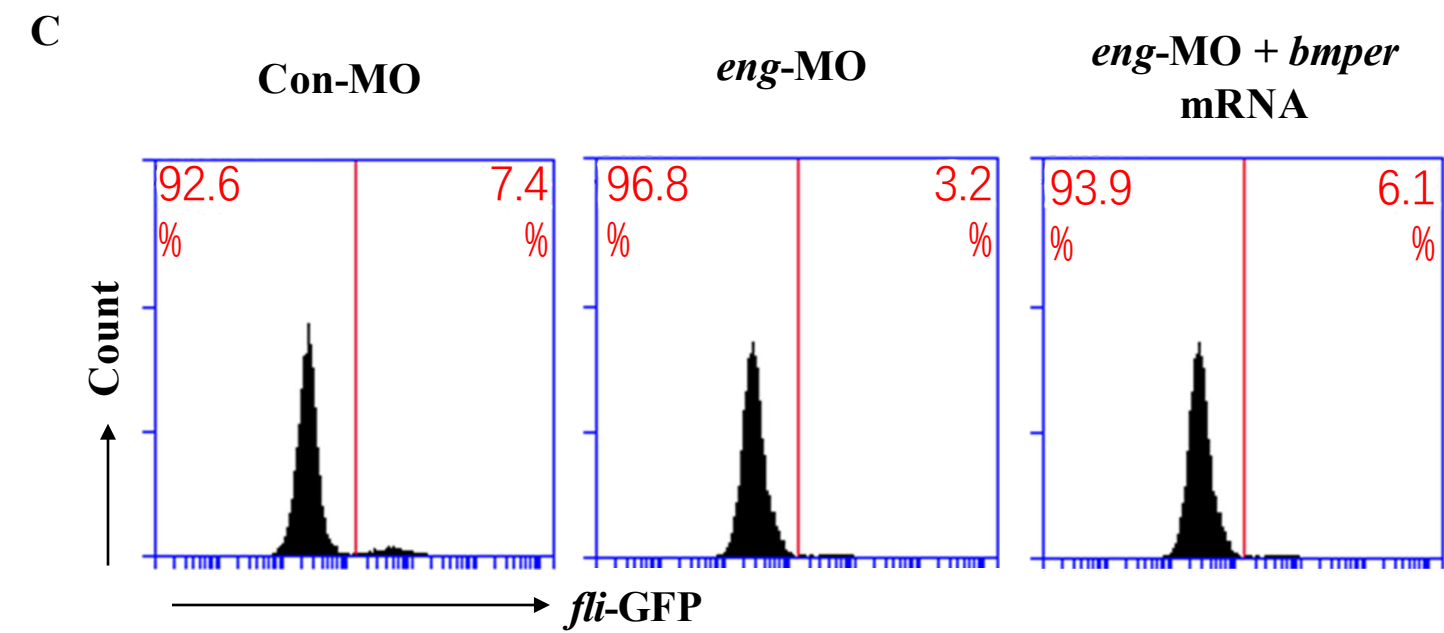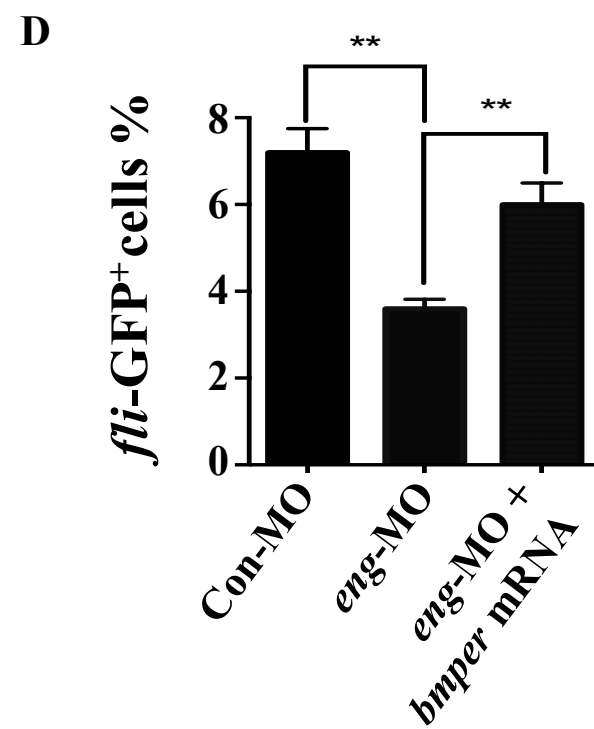

A

24 hpf

CON-MO

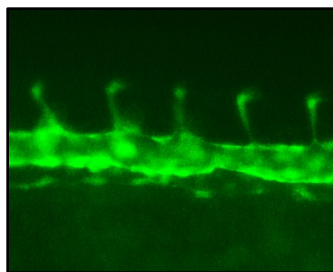

Control

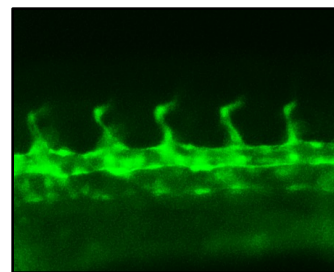*bmp9* mRNA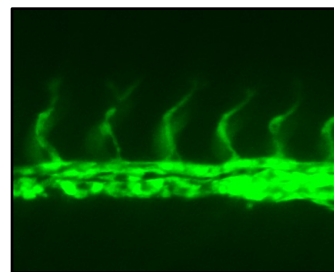*alk1* mRNA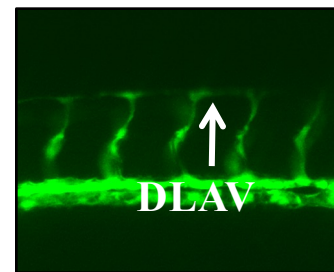*bmp9 + alk1*  
mRNA*eng*-MO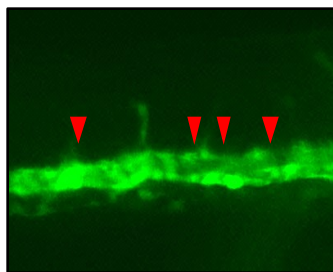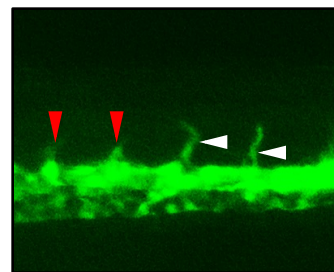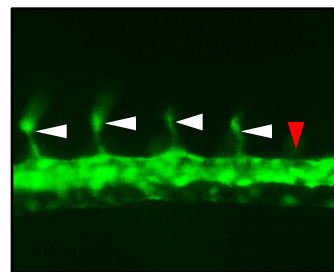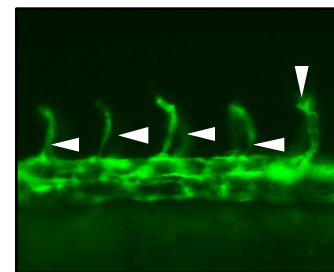

CON-MO

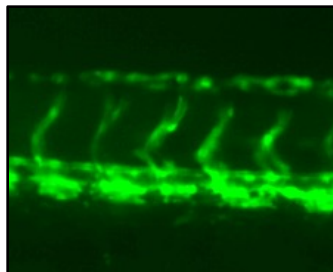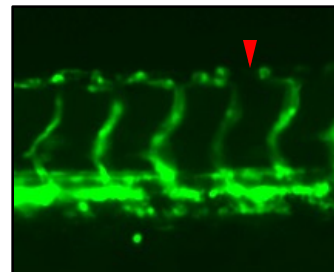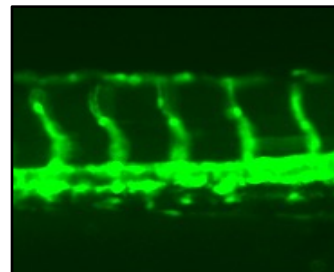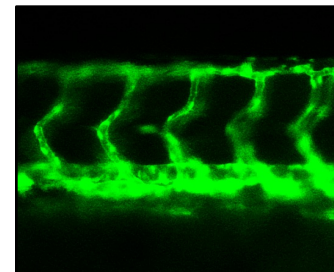*eng*-MO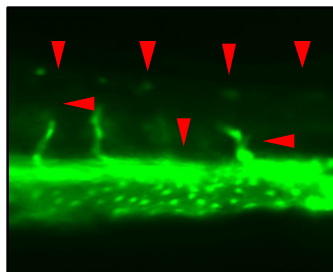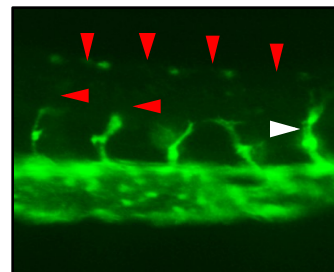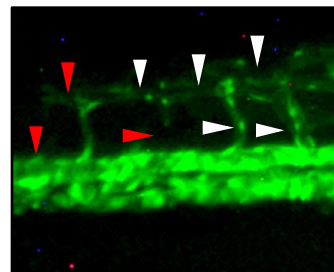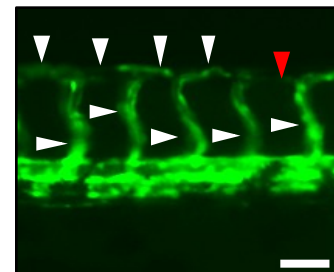

48 hpf

B

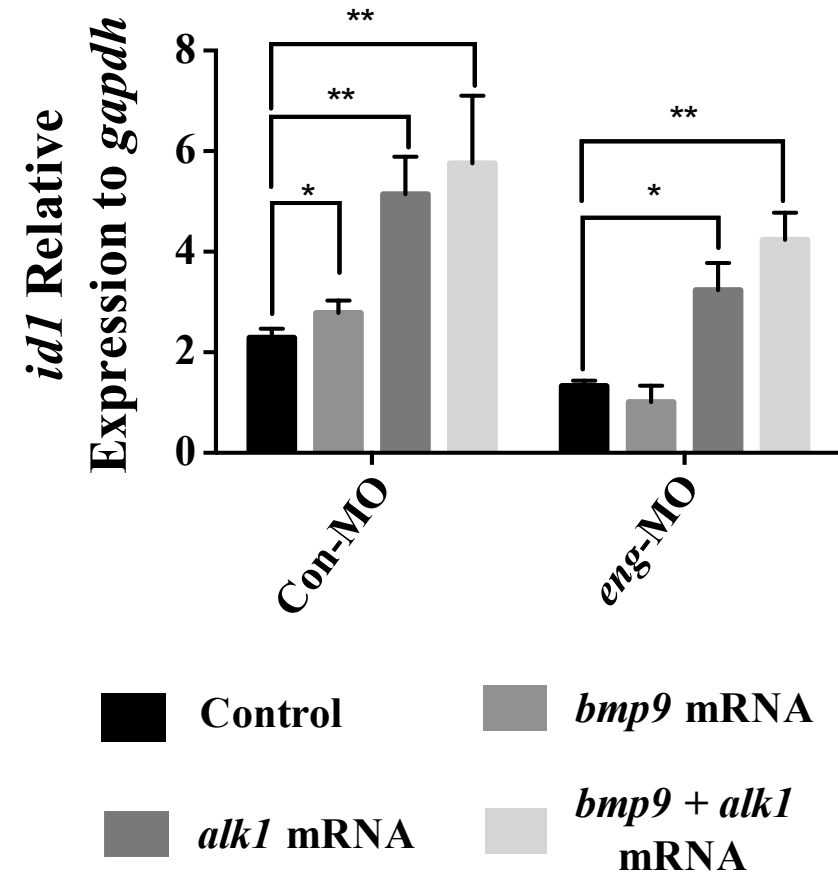

Supplement: bsr-2018-2320_supp.pdf [file bsr-2018-2320_supp.pdf]
